25 **Abstract**

26 All ales are fermented by various strains of *Saccharomyces cerevisiae*. However, recent whole-  
27 genome sequencing has revealed that most commercially available ale yeasts are highly related  
28 and represent a small fraction of the genetic diversity found among wild *S. cerevisiae* isolates.  
29 This lack of diversity limits the phenotypic variations between these strains, which translates into  
30 a limited number of sensory compounds created during fermentation. Here, we characterized a  
31 collection of wild *S. cerevisiae*, *S. kudriavzevii*, and *S. paradoxus* strains for their ability to  
32 ferment wort into beer. Although many isolates performed well, *S. cerevisiae* strain YH166 was  
33 the most promising, displaying excellent fermentation kinetics and attenuation, as well as a  
34 tropical fruit sensory profile. Use of this strain in multiple styles of beer suggested that it is  
35 broadly applicable in the brewing industry. Thus, YH166 is a novel ale strain that can be used to  
36 lend fruity esters to beer and should pair well with citrusy hops in hop-forward ales.

37

38 **Keywords:** *Saccharomyces cerevisiae*; yeast; fermentation; beer

39 **Chemical compounds studied in this article:** Ethanol (PubChem CID: 702); glucose  
40 (PubChem CID: 5793); maltose (PubChem CID: 6255); sucrose (PubChem CID: 5988); xylose  
41 (PubChem CID: 135191)

42 **Abbreviations:** EtOH, ethanol; YPD, yeast extract, peptone, and dextrose; NJ, neighbor-joining;  
43 OD<sub>660</sub>, optical density at 660 nm; OG, original gravity; FG, final gravity; ABV, alcohol by  
44 volume; NE-IPA, New England-style India pale ale

45

## 46 **1. Introduction**

47 Many fermented beverages, including beer, wine, kombucha, and kefir, are produced (at  
48 least in part) by the metabolic action of yeasts in the genus *Saccharomyces* (1). These organisms  
49 are ubiquitous in such applications due to their naturally high levels of tolerance to ethanol  
50 (EtOH), low pH, osmotic stress, and anaerobic conditions (2-4). Of the eight yeasts in the  
51 *Saccharomyces* species complex (*S. arboricola*, *S. cerevisiae*, *S. eubayanus*, *S. jurei*, *S.*  
52 *kudriavzevii*, *S. mikatae*, *S. paradoxus*, and *S. uvarum*) (5), *S. cerevisiae* is most commonly  
53 found in traditionally fermented beverages and is used industrially for beverage fermentation and  
54 bioethanol production (1,6). Indeed, *S. cerevisiae* is used for ale and wine production worldwide.

55 However, recent research has shown that the *S. cerevisiae* strains currently used for these  
56 processes lack in genetic variability. Two different groups performed whole genome sequencing  
57 of 212 (7) and 157 (8) *S. cerevisiae* strains, most of which are used to make beer and wine. Both  
58 groups found that these industrial strains are extremely genetically similar and display high  
59 levels of inbreeding. As such, they represent only a small fraction of the natural genetic diversity  
60 found among wild strains of *S. cerevisiae*. This narrow genotypic and phenotypic variation  
61 among commercially available strains likely limits the spectrum of sensory compounds produced  
62 by these yeasts during fermentation.

63 In beers that are not heavily hopped, the yeast can account for  $\geq 50\%$  of the sensory  
64 profile of the finished beverage (9). Thus, wild *S. cerevisiae* strains represent an untapped  
65 reservoir of aromas and flavors in beverage fermentation. Here, we characterized a collection of  
66 wild *Saccharomyces* strains (10,11) for their evolutionary relatedness to each other and  
67 commercially available ale strains, their ability to metabolize mono- and disaccharides, their  
68 EtOH tolerance, and ability to ferment wort into palatable beer. Of the isolates tested, *S.*

69 *cerevisiae* strain YH166 stood out for its excellent fermentation kinetics, EtOH and osmotic  
70 stress tolerance, and pleasing sensory attributes that were reminiscent of tropical fruit. We  
71 suggest that the use of wild strains such as YH166 for beverage fermentation will represent the  
72 next trend in the ongoing global craft beverage revolution.

73

## 74 **2. Materials and methods**

### 75 *2.1. Strains, media, and other reagents*

76 *S. cerevisiae* strains WLP001 and WLP300 were purchased from White Labs (San Diego,  
77 CA). Wild strains were isolated as described in (10). All yeast strains were grown on yeast  
78 extract, peptone, and dextrose (YPD; 1% (w/v) yeast extract, 2% (w/v) peptone, and 2% (w/v)  
79 glucose) plates containing 2% (w/v) agar at 30°C and in YPD liquid culture at 30°C with  
80 aeration unless otherwise noted. All strains were stored as 15% (v/v) glycerol stocks at -80°C.  
81 Media components were from Fisher Scientific (Pittsburgh, PA, USA) and DOT Scientific  
82 (Burton, MI, USA). All other reagents were of the highest grade commercially available.

### 83 *2.2. Phylogenetic analysis*

84 The wild *Saccharomyces* strains were identified at the species level by sequencing the  
85 variable D1/D2 portion of the eukaryotic 26S rDNA as described (11). After species  
86 identification, the phylogenetic relationships among the strains were determined by aligning their  
87 rDNA sequences using ClustalX (12). The alignments were iterated at each step but otherwise  
88 utilized default parameters. ClustalX was also used to draw and bootstrap neighbor-joining (N-J)  
89 phylogenetic trees using 1000 bootstrap trials; the trees were visualized with TreeView v. 1.6.6  
90 software (<http://taxonomy.zoology.gla.ac.uk/rod/rod.html>). The *Schizosaccharomyces pombe*

91 rDNA sequence (GenBank accession HE964968) was included in the alignments as the  
92 outgroup, and this was used to root the N-J tree in TreeView. WLP001 and WLP300 were  
93 included to determine the relatedness of the wild strains to a commercially available ale yeasts.

### 94 *2.3. Sugar metabolism*

95 The yeast strains were grown by inoculating 5 mL YPD liquid medium with single  
96 colonies from YPD plates and incubation overnight at 30°C with aeration. The optical density at  
97 660 nm ( $OD_{660}$ ) of each culture was determined using a Beckman Coulter DU730 UV/Vis  
98 Spectrophotometer. Then, the cells were diluted to an  $OD_{660} = 0.1$  in 200  $\mu$ L YPD medium  
99 containing 2% (w/v) glucose, maltose, sucrose, or xylose in round-bottom 96-well plates,  
100 overlaid with 50  $\mu$ L mineral oil to prevent evaporation, and incubated at 30°C with shaking in a  
101 BioTek Synergy H1 plate reader. The  $OD_{660}$  of every well was measured and recorded every 15  
102 min for 14-15 h, and these values were plotted vs. time to generate growth curves. All growth  
103 experiments were repeated  $\geq 3$  times, and the plotted points represent the average  $OD_{660}$  values.  
104 Error bars representing standard deviations were omitted for clarity.

### 105 *2.4. EtOH and glucose tolerance*

106 Ethanol tolerance was measured as above but in 96-well plates containing YPD liquid  
107 medium or YPD liquid medium supplemented with 5, 10, or 15% EtOH. Glucose tolerance was  
108 likewise assessed in 96-well plates containing YPD liquid medium (2% (w/v) glucose) or YP  
109 liquid medium supplemented with 10, 20, or 30% (w/v) glucose.

### 110 *2.5. Test fermentations*

111 Laboratory-scale fermentations were performed as described (11). Briefly, the yeast  
112 strains were grown to saturation in 4 mL of YPD liquid medium and used to inoculate ~400 mL

113 of blonde ale wort (1.050 original gravity (OG)) in 500-mL glass fermenters fitted with standard  
114 plastic airlocks. The fermenting cultures were incubated at ~22°C for 2 weeks. Un-inoculated  
115 wort was treated as above to control for wort sterility. Prior to bottling into standard 12-oz brown  
116 glass bottles, their final gravity (FG) was measured using a MISCO digital refractometer (Solon,  
117 OH). Bottle conditioning was conducted as in (13) at room temperature for  $\geq 2$  weeks. The  
118 comparisons between WLP001 and YH166 fermentations were conducted in 1-L glass cylinders  
119 (30 cm tall, 7.5 cm inner diameter) for 6-7 days at an average temperature of  $23.6 \pm 0.3^\circ\text{C}$ . The  
120 gravity and alcohol by volume (ABV) were monitored in real time using BeerBug digital  
121 hydrometers (Sensor Share, Richmond, VA). Small-batch (15-20 L) fermentations were  
122 performed by the Bloomington Hop Jockeys (<http://hopjockeys.org>) home brewing club  
123 (Bloomington, IN). Multiple worts were produced for these trials, which are detailed in the  
124 Supplementary Materials.

125

### 126 **3. Results**

#### 127 *3.1. Phylogeny of the wild Saccharomyces strains*

128 As we previously reported (10,11), we have isolated hundreds of wild yeasts with the  
129 potential for use in the beverage fermentation industry. Among the strains isolated, many  
130 *Saccharomyces* species were uncovered, including 37 *S. cerevisiae*, eight *S. paradoxus*, and one  
131 *S. kudriavzevii* (11). Because some of these samples came from locations in and around  
132 production breweries, we screened them for potential contamination by commercial strains of  
133 brewer's yeast. To do so, we aligned the D1/D2 region of their rDNA and constructed a  
134 phylogenetic tree to compare the evolutionary relatedness of the isolated strains with commercial

135 controls (Fig. 1). We found that the yeasts clustered into six distinct clades (I-VI), with the *S.*  
136 *paradoxus* and *S. kudriavzevii* strains all contained within Clade IV. The two commercial strains  
137 WLP001 and WLP300 were grouped into Clade V and appear to be closely related to the YH196  
138 and WYP75 isolates, respectively. This suggests that YH196 and WYP75 could be commercial  
139 contaminants, and thus, they were excluded from further analyses.

### 140 3.2. Characterization of sugar metabolism, ethanol tolerance, and flocculation.

141 To begin to triage the isolated *Saccharomyces* strains for those most likely to perform  
142 well in beer fermentation, we sought to characterize their abilities to metabolize various sugars,  
143 their ethanol tolerance, and how well they flocculate. First, to assay for sugar metabolism, we  
144 followed the growth of each strain in rich medium (YP) supplemented with 2% (w/v) of two  
145 common monosaccharides (glucose and xylose) and disaccharides (maltose and sucrose). We  
146 found that the wild isolates could be phenotypically categorized into four groups, representatives  
147 of which are shown in Figure 2A-D. Yeasts in Group 1 could equivalently utilize the preferred  
148 sugars glucose and sucrose but displayed only minimal growth in the presence of xylose and  
149 maltose (Fig. 2A). Strains in Group 2 were likewise able to metabolize glucose and sucrose, as  
150 well as displayed an intermediate level of growth in medium containing maltose (Fig. 2B). The  
151 isolates in Group 3 displayed similar growth kinetics and cell densities in the presence of  
152 glucose, maltose, and sucrose but only moderate growth in xylose-containing medium (Fig. 2C).  
153 Finally, the yeasts in Group 4 grew well in the presence of all four tested carbon sources but  
154 achieved the highest cell densities in medium containing glucose or sucrose (Fig. 2D).

155 Next, ethanol tolerance was similarly assessed by growing strains in YPD medium  
156 containing 0-15% ABV. Again, the various strains could be grouped based on their growth  
157 curves. As shown in Figure 3A, some strains were insensitive to increasing EtOH concentrations,

158 growing as rapidly and to nearly as great a density in the presence of 15% ABV as in the  
159 complete absence of EtOH. Other strains displayed similar sensitivities to all concentrations of  
160 EtOH tested, though growth was still evident (Fig. 3B). However, most strains displayed a  
161 concentration-dependent sensitivity to EtOH, with higher ABVs increasingly inhibiting growth  
162 (Fig. 3C). Regardless, all strains grew to some extent in the presence of 15% ABV (Fig. 3 and  
163 data not shown), corresponding to the well-documented natural EtOH tolerance of  
164 *Saccharomyces* species (2-4).

165 Flocculation was qualitatively assessed by comparing the rate of cell sedimentation by  
166 the wild strains to two commercial controls WLP001 and WLP300 (medium and low  
167 flocculation, respectively, see [www.whitelabs.com](http://www.whitelabs.com)) in small stationary liquid cultures and in  
168 small fermenters. In both cases, all of the wild strains displayed medium or higher levels of  
169 flocculation (Table 1, Supplementary Table 1, and data not shown). However, we did also note  
170 that some of the strains formed rather loose slurries that were easily disrupted, sending cells back  
171 into suspension with only gentle agitation.

### 172 3.3. Small-scale fermentations

173 Aside from the strains that metabolized maltose poorly (*e.g.*, YH37; Fig. 2A), the other  
174 wild isolates all displayed good beer fermentation potential based on our initial tests. To begin to  
175 characterize the brewing capacity of these strains, we performed small wort fermentations with  
176 each. We utilized WLP001 as a positive control for levels of attenuation and flocculation, as  
177 well as a baseline for our sensory analyses. After two rounds of test brewing and analysis, we  
178 chose the most promising strains for additional trials. The full data set can be found in  
179 Supplementary Table 1, and representative strains are shown in Table 1.



180 We found that the *S. paradoxus* isolates ranged in their ability to attenuate from 20-55%  
181 (Table 1 and Supplementary Table 1) with an average attenuation across all strains of ~37%.  
182 Aside from under-attenuation, the beers produced by *S. paradoxus* all smelled and tasted heavily  
183 of adhesive bandages, which was likely due to the production of chlorophenol (14). Thankfully,  
184 only two *S. cerevisiae* strains (WYP15 and WYP16) shared this sensory phenotype  
185 (Supplementary Table 1). Overall, the *S. cerevisiae* strains displayed better attenuation (average  
186 of 69%), though they varied widely from 17-95%. Many of the beers produced were neutral in  
187 aroma and flavor, though some were fruity, had a Belgian strain phenolic character, and/or were  
188 slightly tart and reminiscent of saison or farmhouse ales. The single isolate of *S. kudriavzevii*  
189 attenuated well (68%) and yielded neutral sensory characteristics (Table 1).

190 Of all of the wild *Saccharomyces* strains that we tested, YH166 repeatedly displayed  
191 good brewing characteristics, with excellent attenuation (70-80%), flocculation, and  
192 aroma/flavor production (Table 1). In every tasting panel that we conducted, the sensory profiles  
193 of the beers made by YH166 were consistently characterized as “tropical”, with notes of guava  
194 and green apple. Other strains also displayed similar attenuation and flocculation, but the beers  
195 they produced were generally neutral in sensory and comparatively bland when sampled  
196 alongside beer fermented by YH166. Thus, we focused on YH166 for further characterization.

### 197 3.4. Brewing with YH166

198 *S. cerevisiae* YH166 was isolated from a spontaneous fermentation conducted in a vacant  
199 lot during the summer of 2015 in Indianapolis, IN (11). This wild fermented beer contained six  
200 distinct yeast strains: three isolates of *Brettanomyces bruxellensis* and one strain each of *Candida*  
201 *zeylanoides*, *S. cerevisiae* (YH166), and *Wickerhamomyces anomalus*. YH166 was the fastest  
202 growing and most vigorous fermenting strain of the six under laboratory conditions (data not

203 shown). Indeed, when compared to WLP001 in laboratory-scale fermentations, YH166 reliably  
204 reached terminal attenuation >24 h faster, though its terminal ABV (~5.5%) was always slightly  
205 less than that produced by WLP001 (~6%; Fig. 4A).

206 We typically use low gravity wort for laboratory-scale fermentations. However, ale  
207 strains are commonly utilized in a variety of beer styles, some of which have very high OGs,  
208 such as Russian imperial stouts (15). To determine if YH166 could tolerate high gravity wort, we  
209 assessed the growth of this strain in rich medium containing 2-30% (w/v) glucose. As shown in  
210 Figure 4B, the lag time to exponential growth increased from < 1 h in 2% glucose to > 5 h in  
211 30% glucose. However, YH166 was able to overcome the osmotic stress of the glucose at all  
212 concentrations and grow to high density, suggesting that it is suitable for fermenting worts with a  
213 wide range of OGs.

214 Finally, we assessed the activity of YH166 in a variety of worts and fermentation  
215 conditions (see Supplementary Materials) with the help of the Bloomington Hop Jockeys, a local  
216 home brewing club. It should be noted that each fermentation experiment was only performed a  
217 single time, but we feel that the range of conditions tested is still worthy of report. Consistent  
218 with our laboratory-scale fermentations, YH166 performed well in all of these trials and  
219 produced aromatic (Fig. 4C) and flavor profiles (Fig. 4D) that were reminiscent of apple/pear  
220 and tropical fruit. Contrary to the laboratory-scale experiments, however, these beers were  
221 uniformly cloudy or hazy in appearance (data not shown).

222

## 223 **4. Discussion**

224 The natural tolerance displayed by *Saccharomyces* species to fermentation stresses such  
225 as ethanol, low pH, and anaerobic growth (2-4) have enabled these organisms to dominate most  
226 industries that rely on fermentation worldwide. However, the yeast strains that are currently used  
227 in these processes are highly genetically related (7,8). We sought to characterize wild  
228 *Saccharomyces* strains for their ability to ferment wort into beer to determine if novel sensory  
229 characteristics can be found in the untapped array of yeast isolates present in nature.

230 Based on phylogenetics (Fig. 1) and phenotypic analyses (Fig. 2-3 and Table 1), the  
231 strains in our collection of wild yeasts could be divided into a variety of groups. It was our hope  
232 that one or more of these groupings would be indicative of isolates with positive fermentation  
233 attributes to help direct future yeast hunting efforts. This largely proved not to be the case  
234 though. For instance, phylogenetic clade IV was dominated by *S. paradoxus* strains that  
235 fermented poorly and/or produced unpalatable beer (Fig. 1), but clade IV also contained *S.*  
236 *cerevisiae* YH193 and *S. kudriavzevii* WYP76, both of which produced quaffable ales. The only  
237 strain grouping that was relevant for beer fermentation was Group 1 in sugar metabolism (Fig.  
238 2A). Yeasts in Group 1 utilized maltose poorly and consequently attenuated poorly during  
239 fermentation (Table 1 and data not shown). Such isolates will be avoided during our ongoing  
240 yeast bio-prospecting by only selecting for strains that can rapidly metabolize maltose.

241 Our current results also suggest that *S. paradoxus* strains should be avoided for beer  
242 fermentation. All eight tested here created a repulsive aroma and taste that was reminiscent of  
243 adhesive bandages (Table 1). This is a common off-flavor in beer production that is attributable  
244 to chlorinated phenols (16). Very little has been reported in the scientific literature about brewing  
245 with *S. paradoxus*, and it has been suggested that this is one of the only *Saccharomyces* species  
246 not used commercially for fermentation (17). Perhaps this dearth of information is due to off-

247 putting sensory profiles produced by *S. paradoxus* strains. A brief survey of online resources  
248 indicated that home brewers and craft brewers have successfully used *S. paradoxus* in brewing  
249 without encountering an antiseptic or medicinal sensory profile, but these reports cannot be  
250 verified. Regardless, we collected all of our *S. paradoxus* strains from the bark of oak trees (11),  
251 so chlorophenol production appears to be a common characteristic of wild *S. paradoxus* isolated  
252 from this natural reservoir.

253 Unlike the *S. paradoxus* strains, most of the remaining *Saccharomyces* isolates tested  
254 produced beers with neutral or more flavorful and pleasing sensory profiles (Table 1). Not all of  
255 them attenuated to high levels, but flocculation matched or exceeded the WLP001 control. Serial  
256 re-inoculation of low-attenuating strains into wort for fermentation may help to “domesticate”  
257 such strains by adapting them to beer production (18), and ongoing experiments are investigating  
258 this issue. Many strains, such as YH166, were well suited to fermentation with no manipulation  
259 other than the process of enrichment and pure culturing (10).

260 We chose to focus on strain YH166 due to its excellent fermentation kinetics and tropical  
261 fruit sensory profile. In our laboratory-scale trials, it performed as well as the WLP001 ale  
262 control strain (Fig. 4A) and demonstrated excellent resistance to osmotic stress (Fig. 4B),  
263 suggesting that it can be used to ferment beers with high OGs. YH166 was also amenable to a  
264 variety of beer styles when used by home brewers (see Supplementary Materials) and  
265 consistently produced sensory profiles with apple/pear and tropical fruit notes. Interestingly, the  
266 home brew experiments uniformly yielded beers that were hazy or cloudy in appearance, in  
267 contrast to the high flocculation we found in the laboratory (Table 1). Many factors affect  
268 flocculation (reviewed in (19)), and thus additional experiments should be performed to  
269 determine the effects of variables such as pH, wort gravity, temperature, and cations on YH166

270 flocculation. Regardless, this lack of flocculation coupled with otherwise desirable brewing  
271 characteristics and fruity sensory attributes suggests that YH166 may be an attractive strain for  
272 New England-style India pale ale (NE-IPA) brewing. Indeed, NE-IPAs are cloudy-to-opaque and  
273 generally described as juicy and fruity (20). Thus, novel wild brewing strains such as YH166 can  
274 make an immediate impact on current trending styles of beer and could lead to the development  
275 of new beer styles based around the yeast as the core ingredient.

276

## 277 **Acknowledgements**

278 We thank the members of the Bloomington Hop Jockeys home brewing club for providing  
279 valuable brewing data for strain YH166, as well as members of the Bochman laboratory for  
280 critically reading this manuscript and providing feedback. This work was supported by startup  
281 funds from Indiana University, a Translational Research Pilot Grant from the Johnson Center for  
282 Entrepreneurship in Biotechnology, a grant from the American Homebrewers Association  
283 Research and Education Fund, and funds from Wild Pitch Yeast, LLC (to MLB).

284

## 285 **References**

- 286 1. Walker, G.M. and Stewart, G.G. (2016) *Saccharomyces cerevisiae* in the Production of  
287 Fermented Beverages. *Beverages*, **2**.
- 288 2. Tikka, C., Osuru, H.P., Atluri, N., Raghavulu, P.C., Yellapu, N.K., Mannur, I.S., Prasad, U.V., Aluru,  
289 S., K, N.V. and Bhaskar, M. (2013) Isolation and characterization of ethanol tolerant yeast  
290 strains. *Bioinformation*, **9**, 421-425.
- 291 3. Zhao, X.Q. and Bai, F.W. (2009) Mechanisms of yeast stress tolerance and its manipulation for  
292 efficient fuel ethanol production. *J Biotechnol*, **144**, 23-30.
- 293 4. Wimalasena, T.T., Greetham, D., Marvin, M.E., Liti, G., Chandelia, Y., Hart, A., Louis, E.J., Phister,  
294 T.G., Tucker, G.A. and Smart, K.A. (2014) Phenotypic characterisation of *Saccharomyces* spp.  
295 yeast for tolerance to stresses encountered during fermentation of lignocellulosic residues to  
296 produce bioethanol. *Microb Cell Fact*, **13**, 47.

- 297 5. Dujon, B.A. and Louis, E.J. (2017) Genome Diversity and Evolution in the Budding Yeasts  
298 (Saccharomycotina). *Genetics*, **206**, 717-750.
- 299 6. Tesfaw, A. and Assefa, F. (2014) Current Trends in Bioethanol Production by *Saccharomyces*  
300 *cerevisiae*: Substrate, Inhibitor Reduction, Growth Variables, Coculture, and Immobilization. *Int*  
301 *Sch Res Notices*, **2014**, 532852.
- 302 7. Borneman, A.R., Forgan, A.H., Kolouchova, R., Fraser, J.A. and Schmidt, S.A. (2016) Whole  
303 Genome Comparison Reveals High Levels of Inbreeding and Strain Redundancy Across the  
304 Spectrum of Commercial Wine Strains of *Saccharomyces cerevisiae*. *G3*.
- 305 8. Gallone, B., Steensels, J., Prah, T., Soriaga, L., Saels, V., Herrera-Malaver, B., Merlevede, A.,  
306 Roncoroni, M., Voordeckers, K., Miraglia, L. *et al.* (2016) Domestication and Divergence of  
307 *Saccharomyces cerevisiae* Beer Yeasts. *Cell*, **166**, 1397-1410 e1316.
- 308 9. White, C. (1998), *Brew Your Own*, [https://byo.com/mead/item/62-7-fascinating-facts-about-](https://byo.com/mead/item/62-7-fascinating-facts-about-yeast)  
309 [yeast](https://byo.com/mead/item/62-7-fascinating-facts-about-yeast).
- 310 10. Osburn, K., Ahmad, N.N. and Bochman, M.L. (2016) Bio-prospecting, selection, and analysis of  
311 wild yeasts for ethanol fermentation. *Zymurgy*, **39**, 81-88.
- 312 11. Osburn, K., Amaral, J., Metcalf, S.R., Nickens, D.M., Rogers, C.M., Sausen, C., Caputo, R., Miller,  
313 J., Li, H., Tennessen, J.M. *et al.* (2017) Primary souring: a novel bacteria-free method for sour  
314 beer production. *bioRxiv*.
- 315 12. Larkin, M.A., Blackshields, G., Brown, N.P., Chenna, R., McGettigan, P.A., McWilliam, H.,  
316 Valentin, F., Wallace, I.M., Wilm, A., Lopez, R. *et al.* (2007) Clustal W and Clustal X version 2.0.  
317 *Bioinformatics*, **23**, 2947-2948.
- 318 13. Rogers, C.M., Veatch, D., Covey, A., Staton, C. and Bochman, M.L. (2016) Terminal acidic shock  
319 inhibits sour beer bottle conditioning by *Saccharomyces cerevisiae*. *Food Microbiol*, **57**, 151-158.
- 320 14. Russell, I., Hancock, I.F. and Stewart, G.G. (1983) Construction of Dextrin Fermentative Yeast  
321 Strains That Do Not Produce Phenolic Off-Flavors in Beer. *Journal of the American Society of*  
322 *Brewing Chemists*, **41**.
- 323 15. (2008), *2008 BJCP Style Guidelines*. Beer Judge Certification Program, Inc,  
324 <https://www.bjcp.org/2008styles/style13.php#1f>, Vol. 2017.
- 325 16. Hughes, P. (2011) *Beer: A Quality Perspective*. Academic Press.
- 326 17. Briggs, D., Boulton, C., Brookes, P. and Stevens, R. (2004) *Brewing: Science and Practice*.  
327 Woodhead, Cambridge, UK.
- 328 18. . Wyeast, <http://www.wyeastlab.com/yeast-harvesting-re-pitching>, Vol. 2017.
- 329 19. Soares, E.V. (2011) Flocculation in *Saccharomyces cerevisiae*: a review. *J Appl Microbiol*, **110**, 1-  
330 18.
- 331 20. Miller, N. (2017), *Craft Beer & Brewing Magazine*, [https://beerandbrewing.com/the-ipas-of-](https://beerandbrewing.com/the-ipas-of-new-england/)  
332 [new-england/](https://beerandbrewing.com/the-ipas-of-new-england/).

333

334

335 **Tables**

336 **Table 1. Laboratory-scale fermentation results of select strains.**

| Strain | Species <sup>a</sup>   | Attenuation <sup>b</sup> | Flocculation | Sensory                                                |
|--------|------------------------|--------------------------|--------------|--------------------------------------------------------|
| YH35   | <i>S. paradoxus</i>    | 27%                      | High         | Chlorophenol/bandage                                   |
| YH37   | <i>S. paradoxus</i>    | 44%                      | Medium       | Chlorophenol/bandage                                   |
| YH38   | <i>S. paradoxus</i>    | 41%                      | Medium       | Chlorophenol/bandage, vegetal                          |
| YH44   | <i>S. cerevisiae</i>   | 44%                      | Medium       | Clean, neutral                                         |
| YH76   | <i>S. paradoxus</i>    | 41%                      | Medium       | Chlorophenol/bandage                                   |
| YH124  | <i>S. cerevisiae</i>   | 31%                      | Medium       | Neutral                                                |
| YH166  | <i>S. cerevisiae</i>   | 70-80%                   | High         | Green apple, guava, dry, slightly tart, tropical fruit |
| WYP2   | <i>S. cerevisiae</i>   | 65-80%                   | Medium       | Clean, neutral, reminiscent of lager                   |
| WYP4   | <i>S. cerevisiae</i>   | 61%                      | Medium       | Silky mouthfeel, cereal grain notes                    |
| WYP5   | <i>S. cerevisiae</i>   | 61%                      | Medium       | Saison-like                                            |
| WYP6   | <i>S. cerevisiae</i>   | 75-85%                   | Medium       | Thin, farmhouse-like, pithy, earthy                    |
| WYP7   | <i>S. cerevisiae</i>   | 70-80%                   | Medium       | Crisp, dry, slightly bitter, reminiscent of champagne  |
| WYP43  | <i>S. cerevisiae</i>   | 60-80%                   | Medium       | Clean, fruity esters, Belgian phenolic                 |
| WYP76  | <i>S. kudriavzevii</i> | 68%                      | Medium       | Neutral                                                |
| WLP001 | <i>S. cerevisiae</i>   | 70-80%                   | Medium       | Clean, neutral, slightly fruity                        |

337

338 <sup>a</sup> All species are in the *Saccharomyces* genus.

339 <sup>b</sup> Strains displaying a range of attenuation were brewed with up to six times to delineate the  
340 range. The others were brewed with at least two times, and the greatest attenuation is reported.

341

342 **Figure legends**

343 **Figure 1. Evolutionary relationships among the wild *Saccharomyces* strains and two**  
344 **commercially available ale yeasts.** The D1/D2 rDNA sequences of the indicated strains were  
345 aligned, and the phylogenetic relationships among them were drawn as a rooted N-J tree using  
346 *Schizosaccharomyces pombe* as the outgroup. Six distinct clades of strains are marked with  
347 Roman numerals. The *S. paradoxus* strains are highlighted red, and the *S. kudriavzevii* strain is  
348 highlighted orange. The WLP001 and WLP300 commercial strains are boxed in blue.

349 **Figure 2. Growth curves of representative strains utilizing various sugars.** Small liquid  
350 cultures of the strains indicated on the y-axes were grown in 96-well plates in YP medium  
351 supplemented with 2% (w/v) of the indicated sugars. The OD<sub>660</sub> of each well was monitored with  
352 a plate reader. Four different phenotypes were found: A) yeasts in Group 1 grew poorly in the  
353 presence of xylose and maltose; B) yeasts in Group 2 displayed a moderate level of growth in the  
354 presence of maltose; C) yeasts in Group 3 grew very well in the presence of maltose; and D)  
355 yeasts in Group 4 grew well in the presence of all tested sugars. The plotted points in each curve  
356 represent the average normalized OD<sub>660</sub> values of  $\geq 3$  independent experiments.

357 **Figure 3. EtOH tolerance of representative strains.** Small liquid cultures of the strains  
358 indicated on the y-axes were grown in 96-well plates in YPD medium or YPD medium  
359 supplemented with the indicated amount of EtOH. The OD<sub>660</sub> of each well was monitored with a  
360 plate reader. Four different phenotypes were found: A) tolerance of EtOH up to 15% (v/v), B)  
361 similar sensitivities to 5-15% EtOH, and C) concentration-dependent sensitivity to EtOH. The  
362 plotted points in each curve represent the average normalized OD<sub>660</sub> values of  $\geq 3$  independent  
363 experiments.



364 **Figure 4. YH166 displays rapid fermentation kinetics and tolerance to osmotic stress.** A) *S.*  
365 *cerevisiae* strains YH166 and WLP001 were independently inoculated into fermenters containing  
366 a 1.050 OG wort, and the fermentation kinetics were followed in real time using Wi-Fi-enabled  
367 digital hydrometers. SG is plotted on the left y-axis and ABV (%) on the right. The data shown  
368 are representative of three independent fermentations for each strain. B) Small liquid cultures of  
369 YH166 were grown in 96-well plates in YP medium supplemented with the indicated  
370 concentrations of glucose. The OD<sub>660</sub> of each well was monitored with a plate reader. The  
371 plotted points in each curve represent the average normalized OD<sub>660</sub> values of  $\geq 3$  independent  
372 experiments. C) Spider plot of aroma descriptors for beers fermented with YH166 (see  
373 Supplementary Materials for details). D) Spider plot of flavor descriptors for beers fermented  
374 with YH166 (see Supplementary Materials for details).

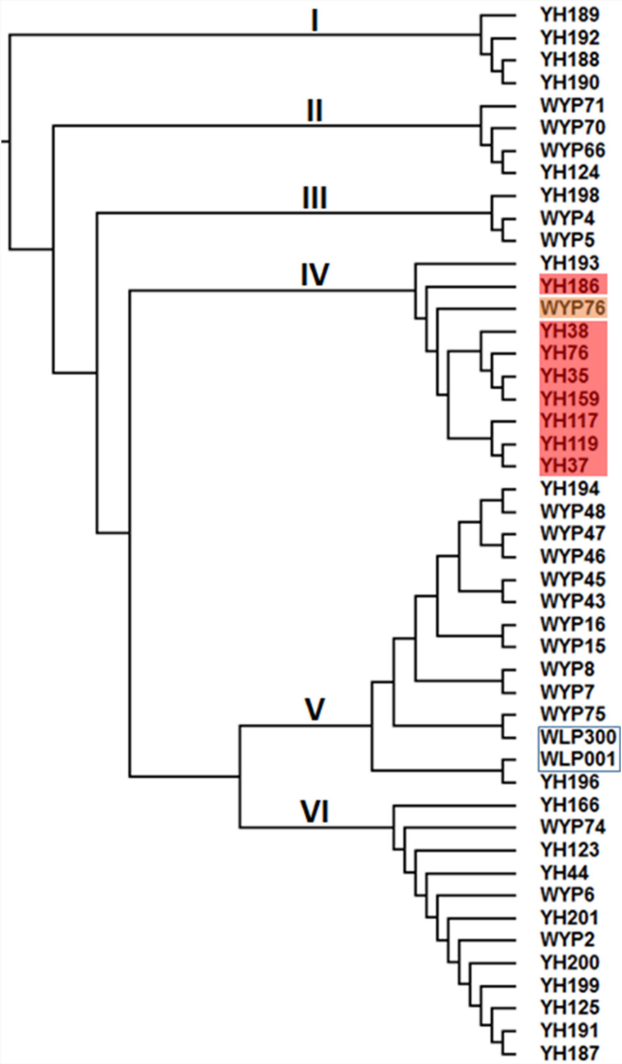

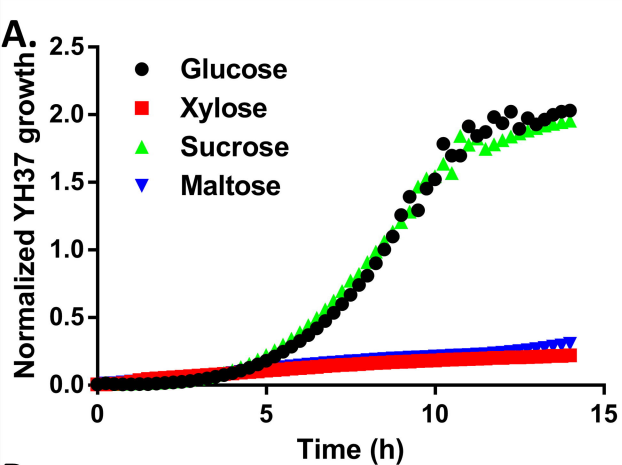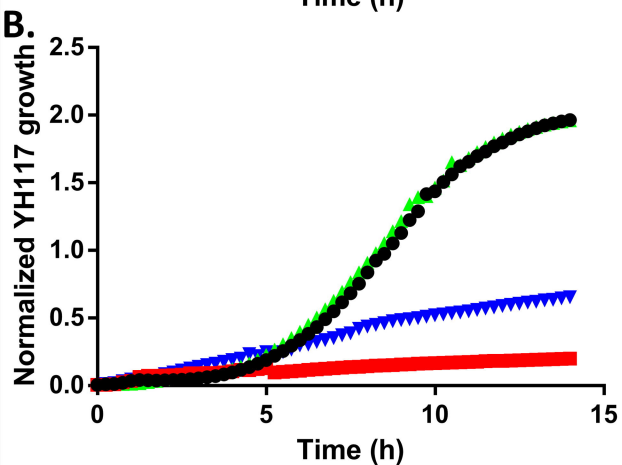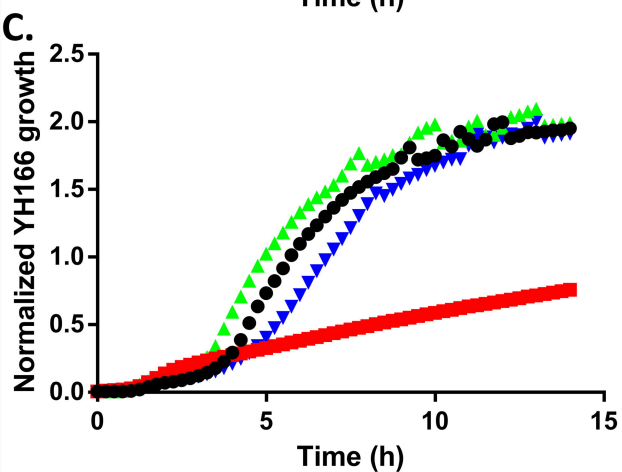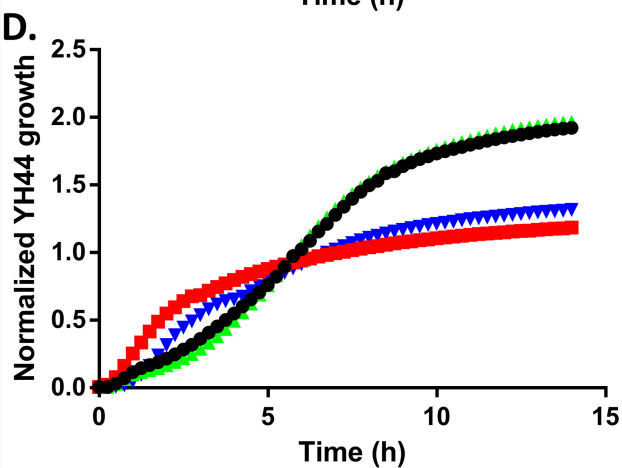

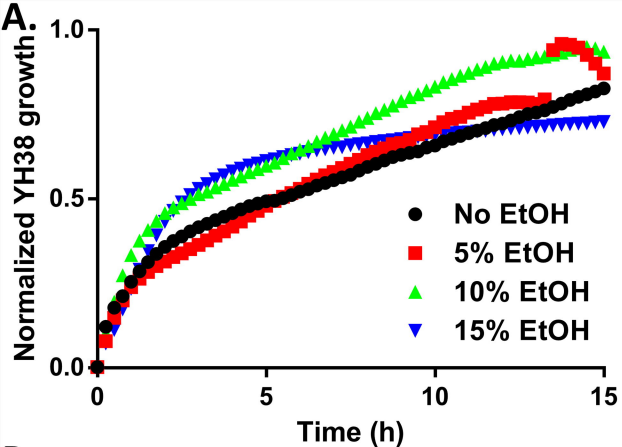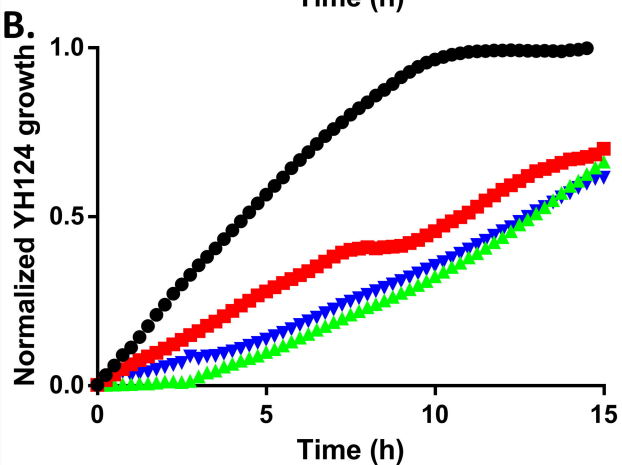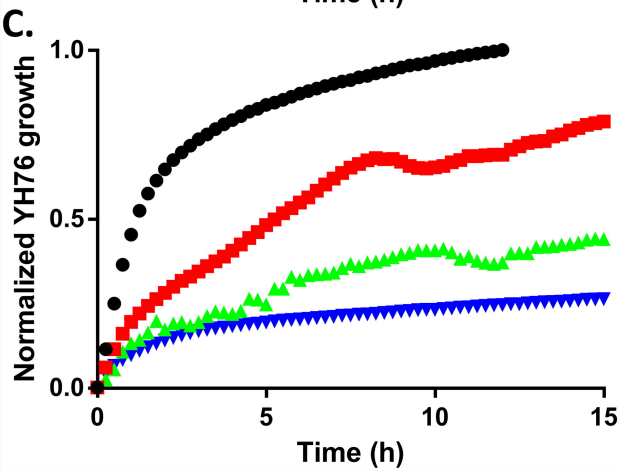

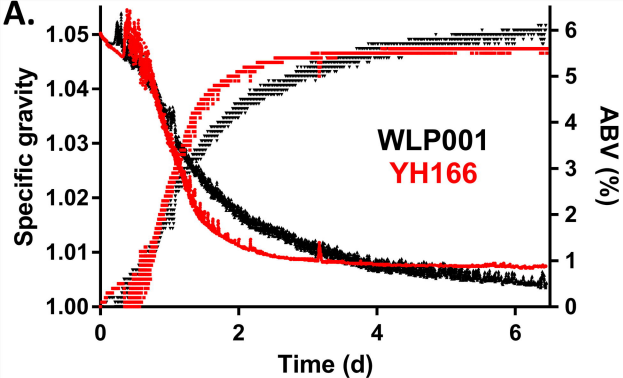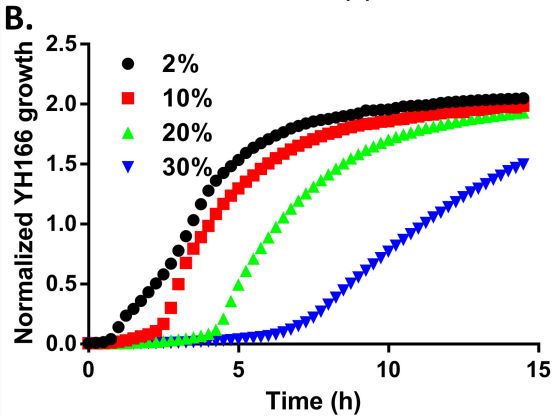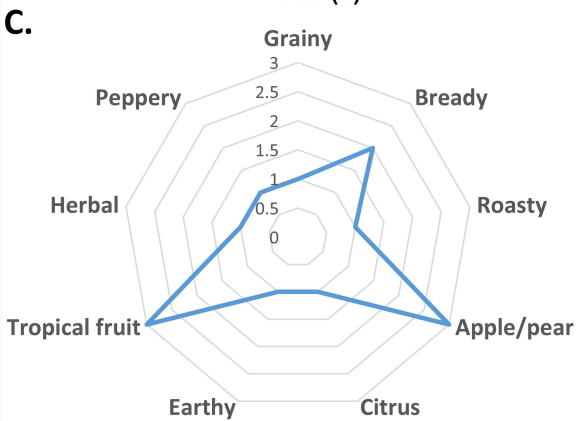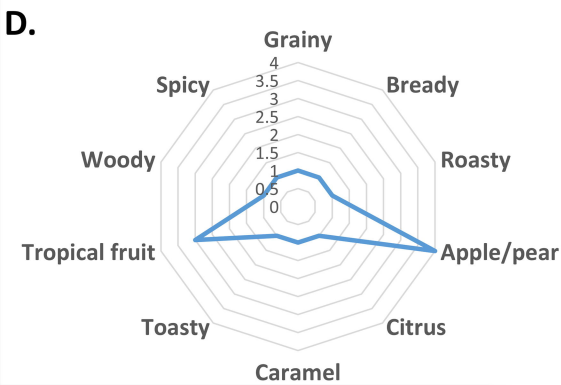

Source: http://www.biorxiv.org/content/10.1101/149732v1.full.pdf
